# Supplementary material for: Isolation and Pathogenicity of a Novel Goose Astrovirus from Overfed Adult Landaise Geese in China
Source: MDPI journal article supplement (doi:10.3390/v14122806), 2022-12-15
Supplement: s1 [file s1]

**Table S1.** Primers used for the amplification of full-length genomes of the GAsV strain ZJ CX.

| Primers          | Sequences (5'-3')          | Amplicon size (bp) | Purpose           |
|------------------|----------------------------|--------------------|-------------------|
| GAsV 1F          | CCGAAACAGCGATATGGCGGCCGGTG | 2266               | Genome sequencing |
| GAsV 2246R       | GTCCTCTCGCAATTCCTCAA       |                    |                   |
| GAsV 1976F       | CTGGCTGGTGTATTATTGATG      | 1198               | Genome sequencing |
| GAsV 3154R       | GACCATCAAACAATGAGTGCAT     |                    |                   |
| GAsV 3049F       | GAGCAGCGCAAAAGGATCTG       | 1498               | Genome sequencing |
| GAsV 4529R       | TAAGACCACAGAAAGTCATA       |                    |                   |
| GAsV 4440F       | GACACGAATGTCGTCATAG        | 2698               | Genome sequencing |
| GAsV 7119R       | CTTAAAAATCACATTTGATTC      |                    |                   |
| GAsV 6795F       | GACTTCCACCTAGCAGTCTC       | NA                 | 3'RACE            |
| GAsV 6838F       | AAGAAGAGGCTGAGTACTGGA      | NA                 | nest PCR          |
| GAsV 412R        | GTTGGACAAGAGCTCCACATCG     |                    | 5'RACE            |
| GAsV 204R        | GCATTACACTTCATGAGAGCA      | NA                 | nest PCR          |
| GAsV II-F        | GAGCAGGACCAGAATGAGAAA      |                    | qRT-PCR           |
| GAsV II-R        | CACCACCAATGAGCCTAGATAC     |                    | qRT-PCR           |
| $\beta$ -actin-F | ACATCAGGAAGGACCTGTACG      |                    |                   |
| $\beta$ -actin-R | GGGGCGATGATCTTGATC         |                    | qRT-PCR           |
| OASL-F           | CAGCGTGTGGTGGTTCTC         |                    |                   |
| OASL-R           | AACCAGACGATGACATACAC       |                    | qRT-PCR           |
| TLR-3-F          | CTCTCTGGAAAAAATAAGCAATTTG  |                    |                   |
| TLR-3-R          | CTCAAGCAAAGTGCATGATTGC     |                    | qRT-PCR           |
| TLR-7-F          | CACAGAAAAATGGTACCTC        |                    |                   |
| TLR-7-R          | TACATCGCAGGGTAAACT         |                    | qRT-PCR           |
| IFN- $\alpha$ -F | CAGCACCACATCCACCAC         |                    |                   |
| IFN- $\alpha$ -R | TACTTGTTGATGCCGAGGT        |                    | qRT-PCR           |
| Mx2-F            | TTCACAGCAATGGAAAGGGA       |                    |                   |
| Mx2-R            | ATTAGTGTCGGGTCTGGGA        |                    | qRT-PCR           |
| IL-6-F           | AAGTTGAGTCGCTGTGCT         |                    |                   |
| IL-6-R           | GCTTTGTGAGGAGGGATT         |                    | qRT-PCR           |
| IL-8-F           | GCTGTCCTGGCTCTTCTCCTGATT   |                    |                   |
| IL-8-R           | GGGTCCAAGCACACCTCTCTGTTG   |                    | qRT-PCR           |
| IL-10-F          | TGCCTCCACTTGTCTGACC        |                    |                   |
| IL-10-R          | TCCTCCATGTAGAACCGCATC      |                    | qRT-PCR           |
| IFITM1-F         | ATCAAGGCCCGAGATAGGA        |                    |                   |
| IFITM1-R         | AGAGTATCACCAGGACCAGAA      |                    | qRT-PCR           |
| TRIM25-F         | CTGGATTTCAACACAGCTCATAAC   |                    |                   |
| TRIM25-R         | CCCAGCACTTGGGAACAATA       |                    |                   |

**Table S2.** Analysis of the main functional amino acid sites between ZJCX and other GAsV II ORFs.

| Protein | Position | Isolates |      |    |        |       |      |      |         |
|---------|----------|----------|------|----|--------|-------|------|------|---------|
|         |          | ZJCX     | AH02 | GD | JSCZ15 | JSW10 | ZJLD | G576 | Others  |
| ORF1a   | 175      | M        | I    | M  | I      | M     | M    | M    | M/I     |
|         | 188      | A        | T    | T  | T      | T     | T    | T    | T       |
|         | 265      | T        | T    | S  | S      | S     | S    | S    | S       |
|         | 355      | I        | I    | V  | V      | V     | I    | V    | V/I     |
|         | 428      | N        | N    | T  | T      | N     | N    | T    | N/T     |
|         | 520      | T        | T    | A  | A      | T     | T    | A    | T/A     |
|         | 527      | V        | A    | A  | A      | A     | A    | A    | A       |
|         | 528      | T        | T    | I  | I      | T     | T    | I    | T/I     |
|         | 535      | R        | R    | S  | S      | R     | R    | S    | R/S     |
|         | 555      | V        | V    | V  | V      | I     | I    | V    | I/V     |
|         | 890      | V        | A    | A  | A      | A     | A    | A    | V/A     |
|         | 910      | P        | Q    | Q  | Q      | Q     | Q    | Q    | Q       |
|         | 911      | K        | E    | E  | E      | E     | E    | E    | E       |
|         | 912      | G        | V    | V  | V      | V     | V    | V    | V       |
|         | 918      | G        | D    | D  | D      | D     | D    | D    | D       |
|         | 927      | V        | A    | A  | A      | A     | A    | A    | A       |
| ORF1b   | 30       | T        | I    | I  | I      | I     | I    | I    | I       |
|         | 167      | R        | K    | K  | K      | K     | K    | K    | K/R     |
|         | 415      | R        | K    | K  | K      | K     | K    | K    | K       |
| ORF2    | 229      | P        | Q    | Q  | Q      | P     | P    | P    | P/Q     |
|         | 289      | A        | A    | A  | T      | T     | A    | T    | A/T     |
|         | 456      | E        | E    | E  | E      | D     | D    | D    | D/E     |
|         | 464      | N        | N    | A  | A      | N     | N    | N    | A/N     |
|         | 498      | L        | L    | I  | I      | I     | I    | I    | L/I     |
|         | 540      | L        | L    | L  | L      | Q     | Q    | Q    | L/Q     |
|         | 586      | T        | S    | S  | T      | S     | S    | S    | T/S     |
|         | 587      | D        | N    | N  | N      | N     | N    | N    | N       |
|         | 610      | G        | E    | E  | E      | E     | E    | D    | E/D     |
|         | 614      | A        | A    | A  | A      | T     | A    | N    | A/N/S/T |
|         | 634      | D        | E    | E  | D      | E     | E    | E    | D/E     |
|         | 695      | T        | A    | A  | A      | A     | A    | A    | A       |

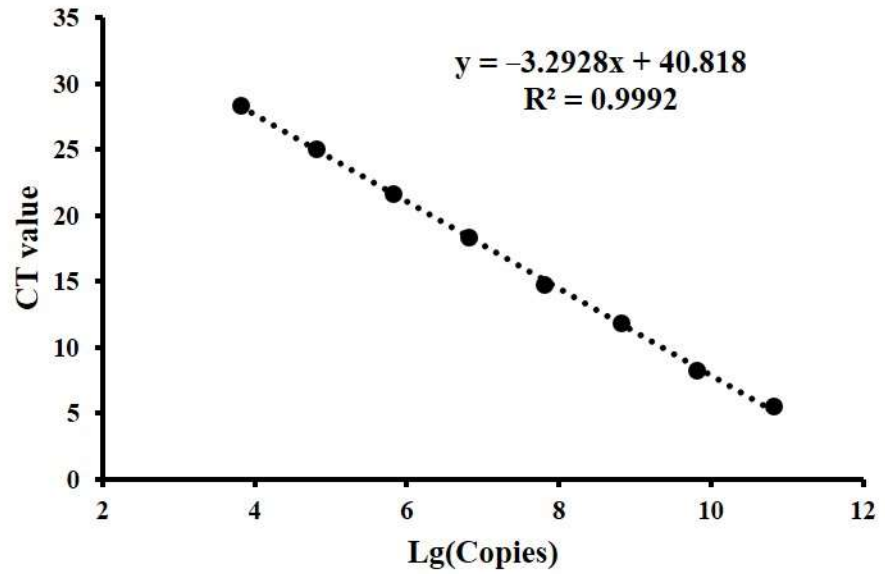

**Figure S1.** Establishment of a standard curve for the Duplex RT-qPCR assay. The RdRp gene fragment was amplified by PCR using GAstV-II cDNA template. The PCR product was purified and linked to the pEASY-T5 vector. DNA concentrations were determined and the copy number per  $\mu\text{L}$  was calculated according to the formula:  $6.02 \times 10^{23} \text{ copies/mol} \times \text{Concentration/Average molecular weight}$ . The recombinant standard plasmid with  $6.49 \times 10^{10} \text{ copies}/\mu\text{L}$  was 10-fold diluted before use. One Step PrimeScript III RT-qPCR Mix was used according to instruction. The standard curve was obtained according to the average threshold cycle (Ct) and the logarithm of the initial copy number.

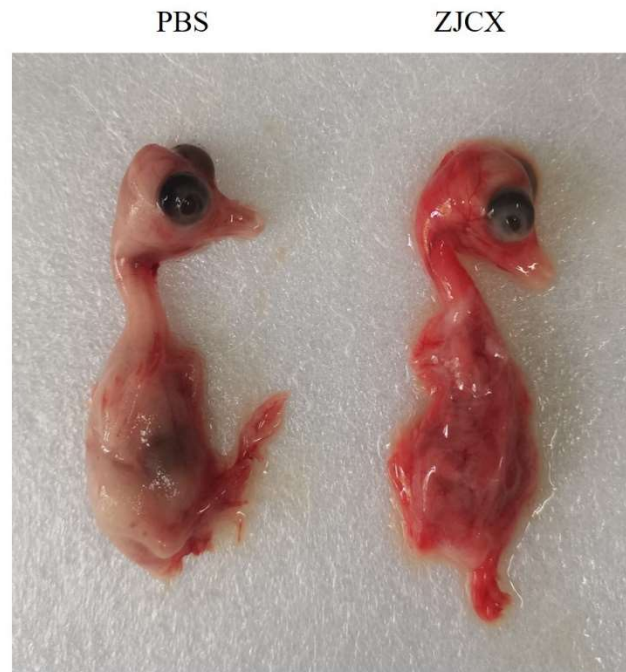

**Figure S2.** Isolation and identification of GAstV in goose embryos. The pathological changes in goose embryos infected with GAstV in the presence of haemorrhage and oedema.

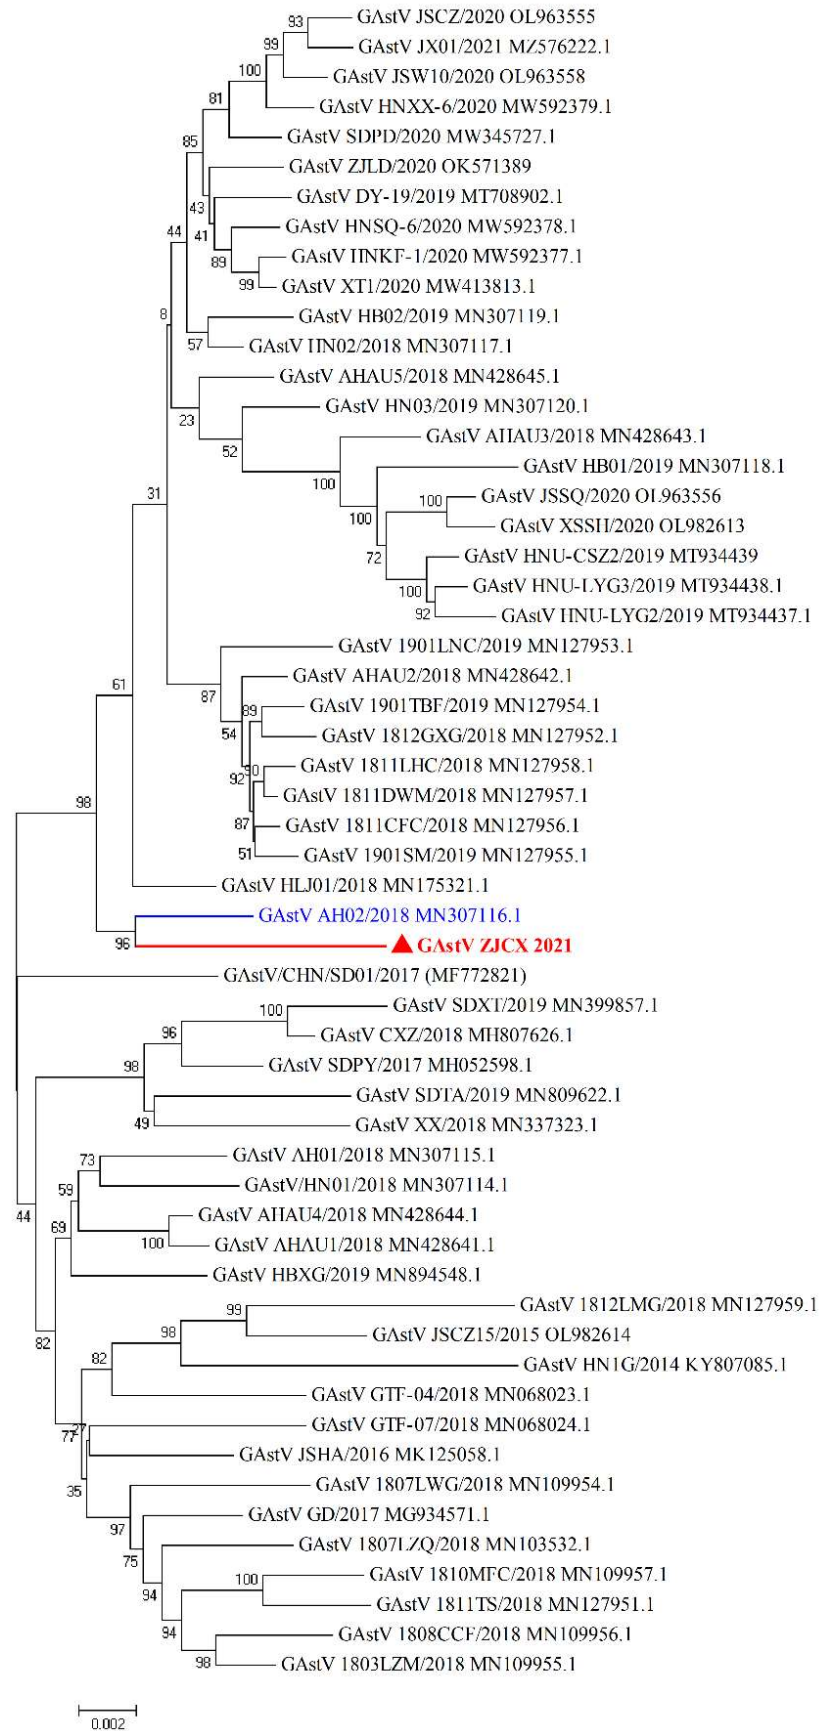

**Figure S3.** Phylogenetic tree of most GAsV II strains in China based on whole-genome sequences. Phylogeny-based genotyping of GAsV strains, constructed based on ClustalW alignment as a neighbor-joining tree via the neighbor-joining method (1,000 bootstrap replicates). The ZJCX (red color) strain get close to AH02 (blue color) in genetic relationships.
